# Supplementary material
Source: publisher figshare collection journal article supplement (https://rs.figshare.com/ndownloader/files/15498701)
Supplement: Supplementary file 1 [file 15498701]

## Sheet: proportions of stop
Context learning before birth: evidence from the chick embryo
Massimo Turatto, Andrea Dissegna, Cinzia Chiandetti
condition	day1		average	day2			Legend
0				1	0.6		0	control
0				0.8	0.8		1	same context
0				1	0.8		2	in ovo
0				0.6	0		3	different context
0				1	1
0				1	0.6
0				0.8	0.6
0				0.8	0.8
0				1	0.8
0				0.8	0.6
0				0.8	0.2
0				0.8	0.6
0				0.8	0.6
0				0.8	0.6
0				0.8	0.8
0				1	0.6
0				1	0.6
0				0.8	0.8
0				1	0.4
0				1	0.6
0				1	0.6
0				0.8	0.6
0				1	1
0				1	0.8
0				0.8	0.6
0				0.8	0.6
0				1	0.4
0				0.8	0.4
0				1	0.6
0				1	0.6
1	0.8	0.4	0.6	0	0
1	1	1	1	0.4	0
1	1	0.6	0.8	0.2	0
1	1	0.4	0.7	0.4	0
1	1	0.6	0.8	0.2	0
1	1	0.6	0.8	0.8	0
1	0.8	0.6	0.7	0.4	0
1	1	0.8	0.9	0.4	0.2
1	1	0.8	0.9	0.2	0
1	1	0.4	0.7	0.4	0
1	1	0.8	0.9	0.6	0.4
1	1	0.6	0.8	0.4	0.2
1	1	1	1	0.8	0.4
1	1	0.8	0.9	0.2	0
1	1	0.8	0.9	0.6	0.2
1	1	0.6	0.8	0.4	0.2
1	1	1	1	0.6	0.2
1	1	1	1	0.2	0
1	1	1	1	0.8	0
1	1	0.8	0.9	0.4	0
1	1	1	1	0.4	0.2
1	1	0.8	0.9	0.4	0.4
1	1	0.8	0.9	1	0.6
1	1	1	1	0.4	0.2
1	1	1	1	0.8	0.2
1	1	0.6	0.8	0	0.4
1	1	0.8	0.9	0.4	0.2
1	1	0.6	0.8	0.6	0
1	1	0.8	0.9	0.8	0.2
1	1	0.8	0.9	0.6	0
2				0.4	0
2				1	0.8
2				0.8	1
2				1	0.6
2				0.8	0.4
2				0.2	0
2				0.8	0.2
2				1	0
2				0.4	0.6
2				0.8	0.4
2				0.6	0
2				0.8	0.4
2				0.8	0.4
2				0.2	0
2				1	0
2				0.6	0.4
2				1	0.8
2				0.6	0.4
2				0.8	0.4
2				0.2	0.6
2				1	0.6
2				1	1
2				0.8	1
2				0.6	0
2				1	0.8
2				1	0.4
2				0.8	0.4
2				0.8	0.2
2				0.8	0.2
2				0.4	0.2
3				0.8	0.4
3				0.6	0.2
3				1	0.4
3				0.8	0.4
3				0.6	0.6
3				1	0.4
3				1	0.4
3				1	0.6
3				1	0.4
3				0.6	0.4
3				0.8	0.4
3				0.8	0.4
3				0.8	0.4
3				0.4	0.4
3				0.8	0.4
3				0.6	0.2
3				0.8	0.4
3				0.6	0.6
3				0.4	0
3				1	0.6
3				0.4	0.6
3				0.8	0.4
3				0.6	0.6
3				0.6	0.6
3				0.6	0.6
3				0.8	0.2
3				1	0.8
3				0.8	0.2
3				1	0.6
3				1	0.6
